# Supplementary material
Source: publisher figshare collection journal article supplement (https://acs.figshare.com/ndownloader/files/3821377)
Supplement: Supplementary file 1 [file 3821377]

Supporting information: Enzyme-Specific Sensors via Aggregation of Charged *p*-Phenylene Ethynylenes

Eric H. Hill<sup>†‡</sup>, Yue Zhang<sup>†</sup>, Deborah G. Evans<sup>‡</sup> and \*David G. Whitten<sup>†</sup>

<sup>†</sup>Center for Biomedical Engineering, Department of Chemical and Nuclear Engineering, University of New Mexico, Albuquerque, New Mexico 87131-1341

<sup>‡</sup>The Nanoscience and Microsystems Engineering Program and Department of Chemistry and Chemical Biology, University of New Mexico, Albuquerque, New Mexico 87131-1341

\*Corresponding Author

e-mail: [whitten@unm.edu](mailto:whitten@unm.edu)

Table S1. Detailed Simulation Information

| Simulation | # OPEs | # DOPG | # Na <sup>+</sup> | # Cl <sup>-</sup> | # Waters | # atoms | Periodic box size (Å) | Simulation length (ns) |
|------------|--------|--------|-------------------|-------------------|----------|---------|-----------------------|------------------------|
| 0_1        | 0      | 42     | 44                | 2                 | 30500    | 97052   | 100                   | 150                    |
| 2_1        | 2      | 6      | 17                | 15                | 15804    | 48426   | 80                    | 100                    |
| 2_2        | 2      | 21     | 15                | 5                 | 30500    | 94472   | 100                   | 150                    |
| 3_1        | 3      | 6      | 15                | 15                | 15804    | 48522   | 80                    | 100                    |
| 4_1        | 4      | 42     | 44                | 10                | 30500    | 97444   | 100                   | 250                    |
| 5_1        | 5      | 20     | 25                | 15                | 15804    | 50562   | 80                    | 100                    |

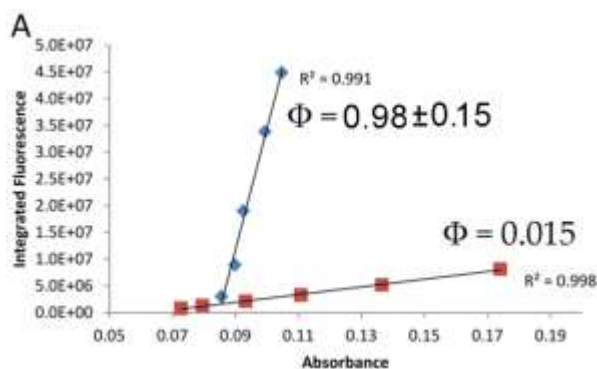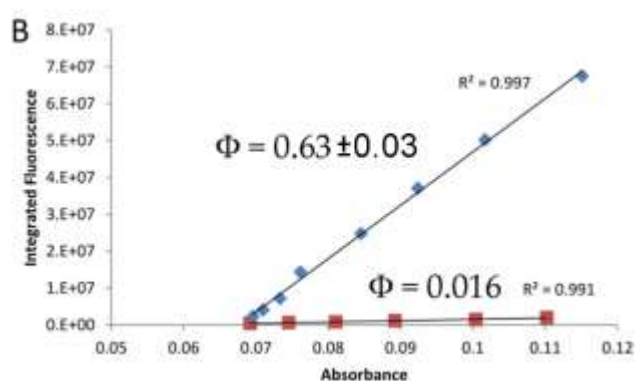

Figure S1. Integrated Fluorescence versus Absorbance for (A) 5  $\mu\text{M}$  -1C (squares) and 5  $\mu\text{M}$  -1C with 32  $\mu\text{M}$  LaCh (diamonds), and (B) 1.4  $\mu\text{M}$  +2C (squares) and 1.4  $\mu\text{M}$  +2C with 16  $\mu\text{M}$  DLPG (diamonds). This data was used to calculate the fluorescence quantum yields by the comparative method, and the new values for the quantum yields that were corrected from a previous study are given next to the line. Excitation was 370 nm for A and 375 nm for B, with fluorescence excitation wavelengths from 390 to 600 nm.

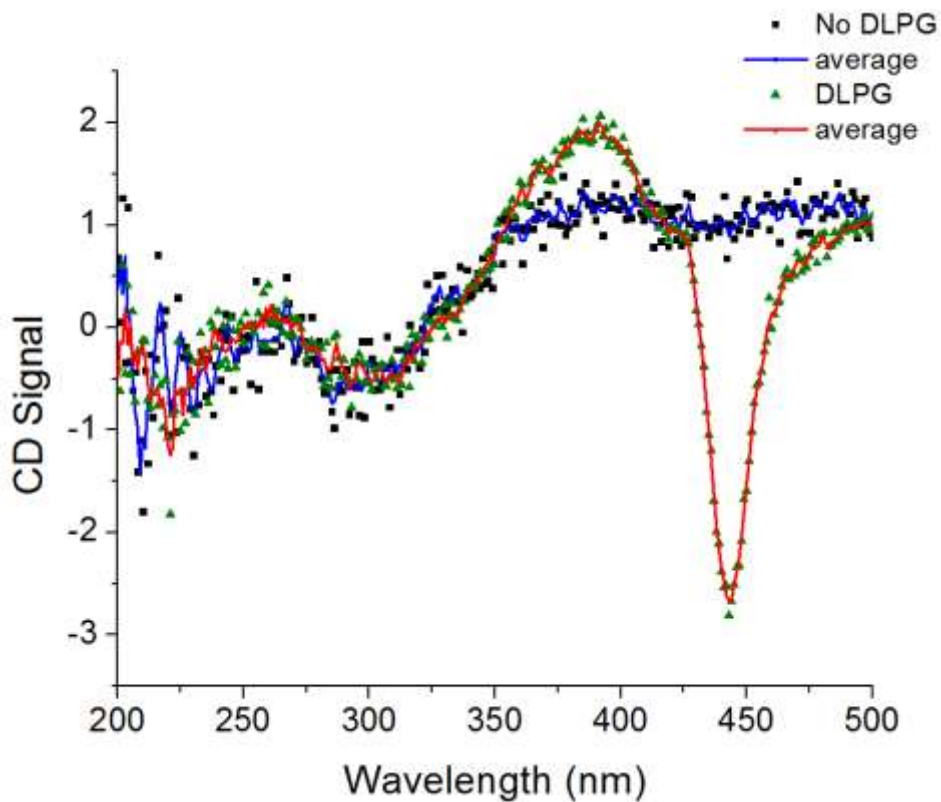

Figure S2. Circular Dichroism spectrum of 1.4  $\mu\text{M}$  +2C with and without 16  $\mu\text{M}$  DLPG added.

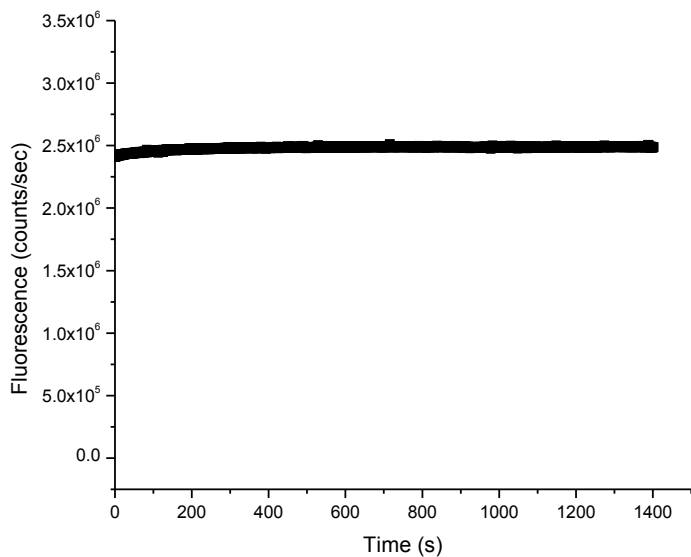

Figure S3. Fluorescence of PLA sensor (Ex. 375 nm; Em. 440 nm) composed of 1.4  $\mu\text{M}$  +2C and 16  $\mu\text{M}$  DLPG following addition of 0.4U of PLC.

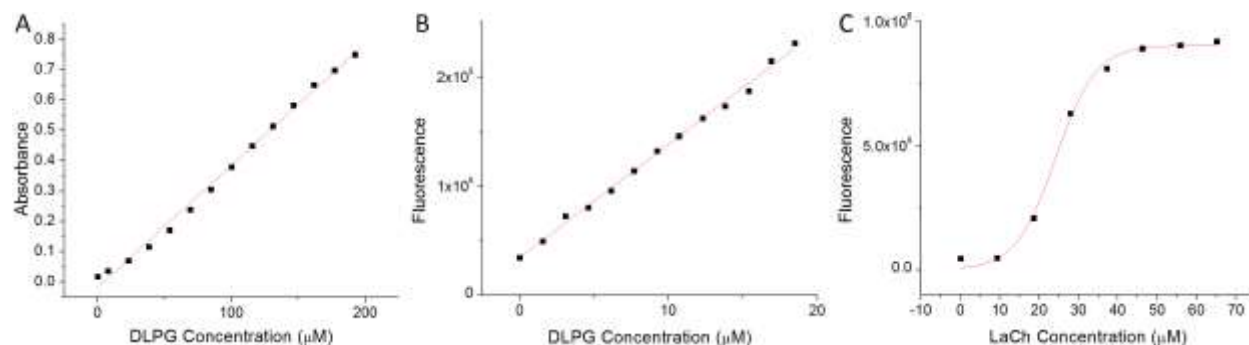

Figure S4. Linear regression of (A) Absorbance of 10  $\mu\text{M}$  OPE-2+; (B) Fluorescence of 1.4  $\mu\text{M}$  OPE-2+ (Ex: 375 nm, Em: 440 nm), with increasing DLPG concentration; (C) Fluorescence of OPE-1- with increasing LaCh concentration (Ex:370 nm, Em: 440 nm).

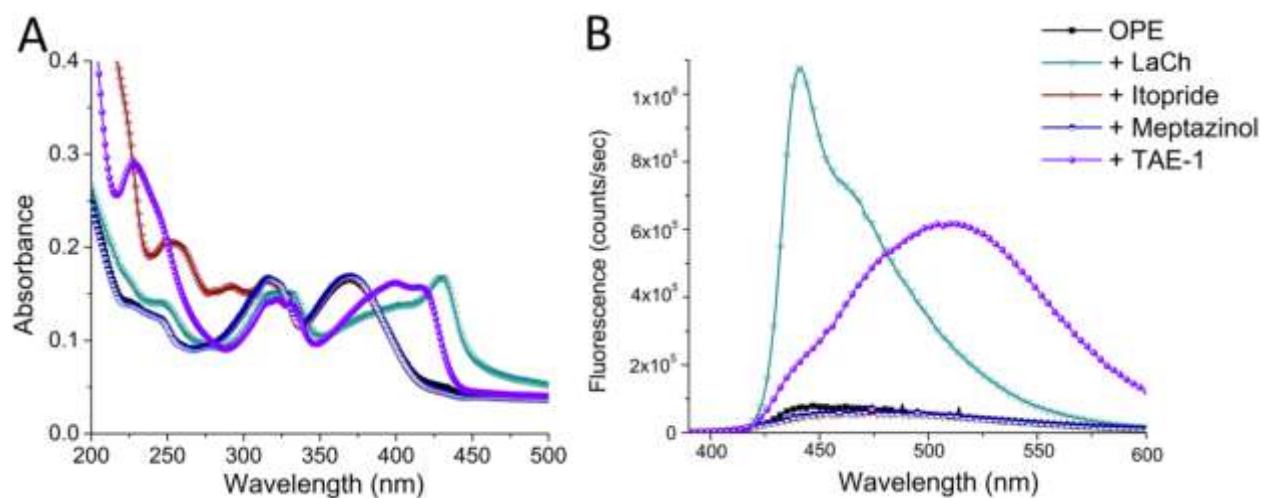

Figure S5. (A) Absorbance and (B) Fluorescence (Ex: 370 nm) of 5  $\mu\text{M}$  -1C with 5  $\mu\text{g/mL}$  of either LaCh or one of the three AChE Inhibitors used in this study.

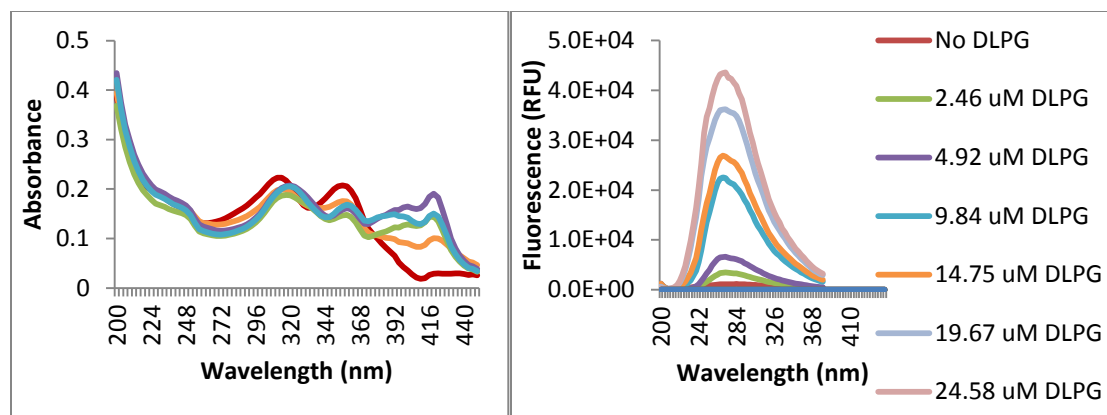

Figure S6. (A) Absorbance and (B) Fluorescence (Ex: 370) of 4.3  $\mu\text{M}$  +1C with various concentrations of DLPG.

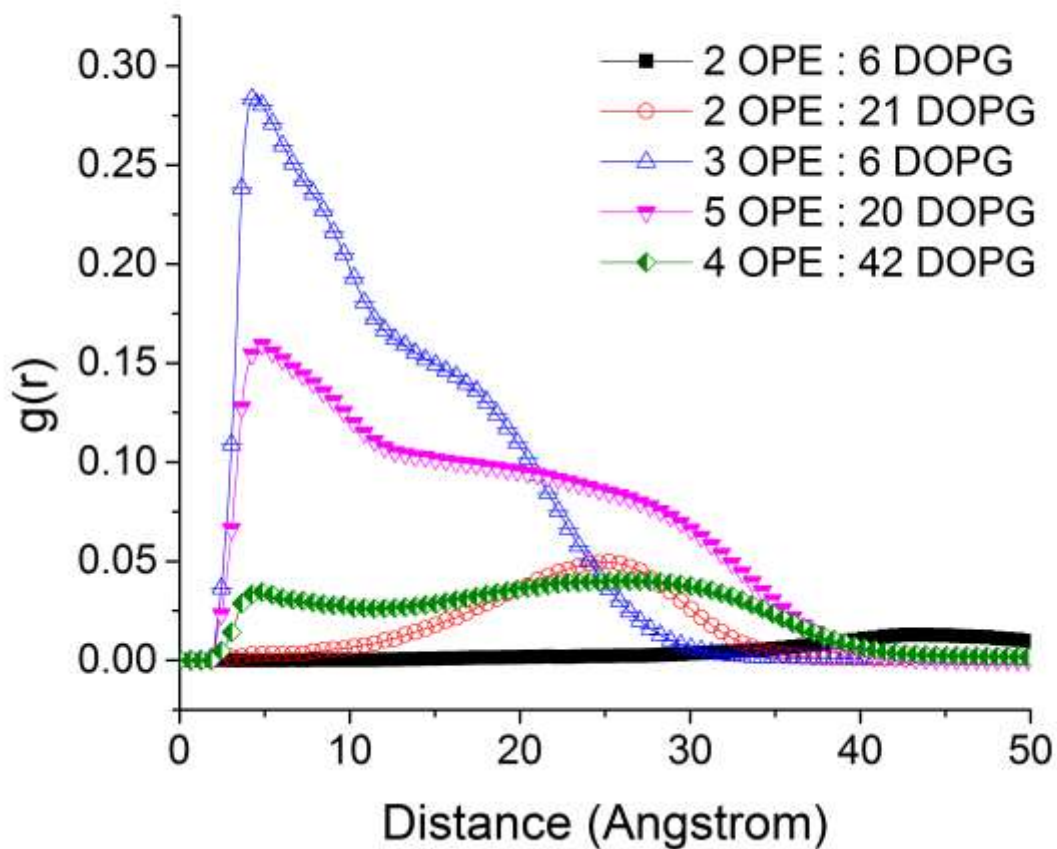

Figure S7. Radial pair distributions between OPEs in the different systems simulated with classical MD. The different simulations are annotated in the legend.

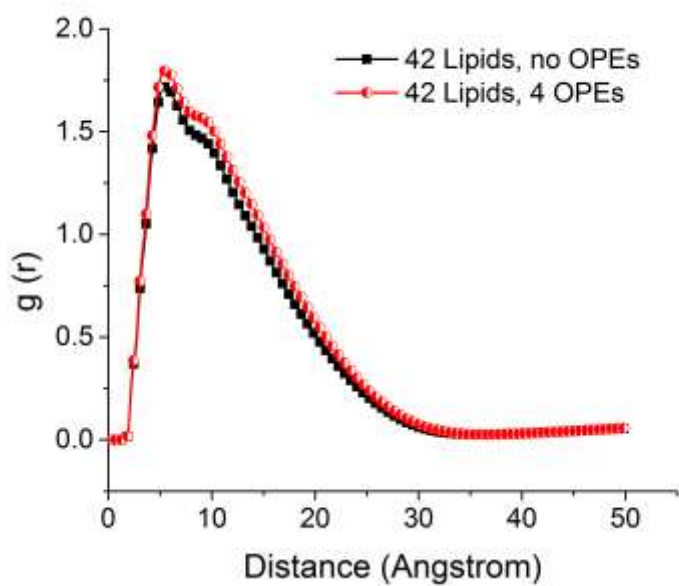

Figure S8. Radial pair distributions of oleyl chains of DOPG in a simulation with 42 lipids and either 0 or 4 OPEs.

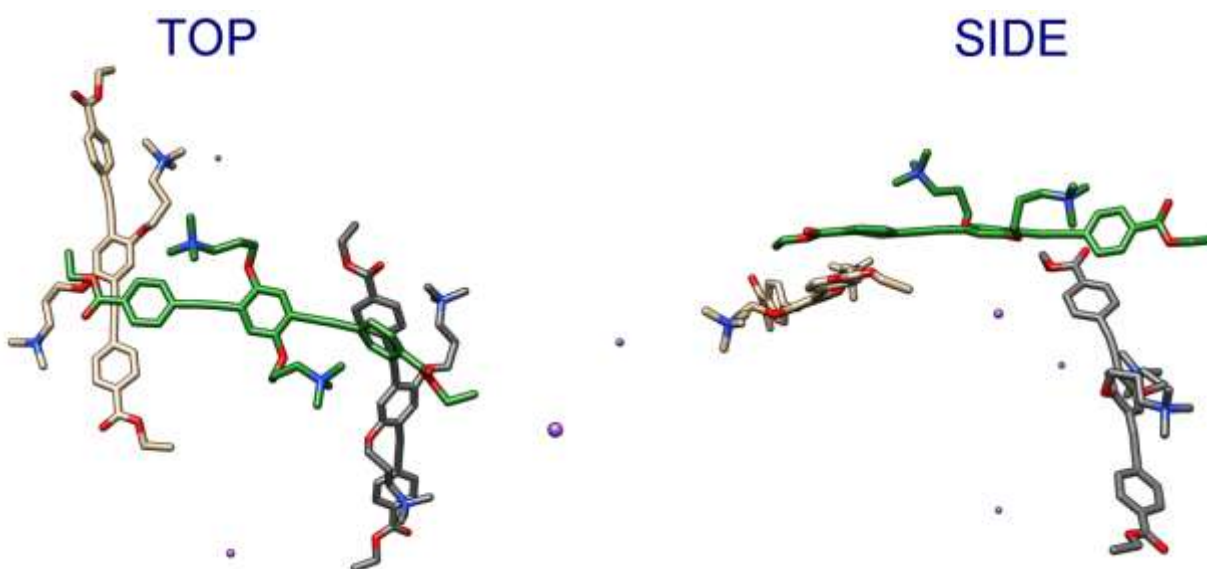

Figure S9. Trimeric aggregate which lasts for final 40 ns of 3 OPE/ 6 DOPG Molecular Dynamics Simulation
